# Supplementary material
Source: PubMed Central journal article supplement (PMC3210435)
Supplement: NIHMS334576-supplement-1.pdf [file NIHMS334576-supplement-1.pdf]

Supplemental Material

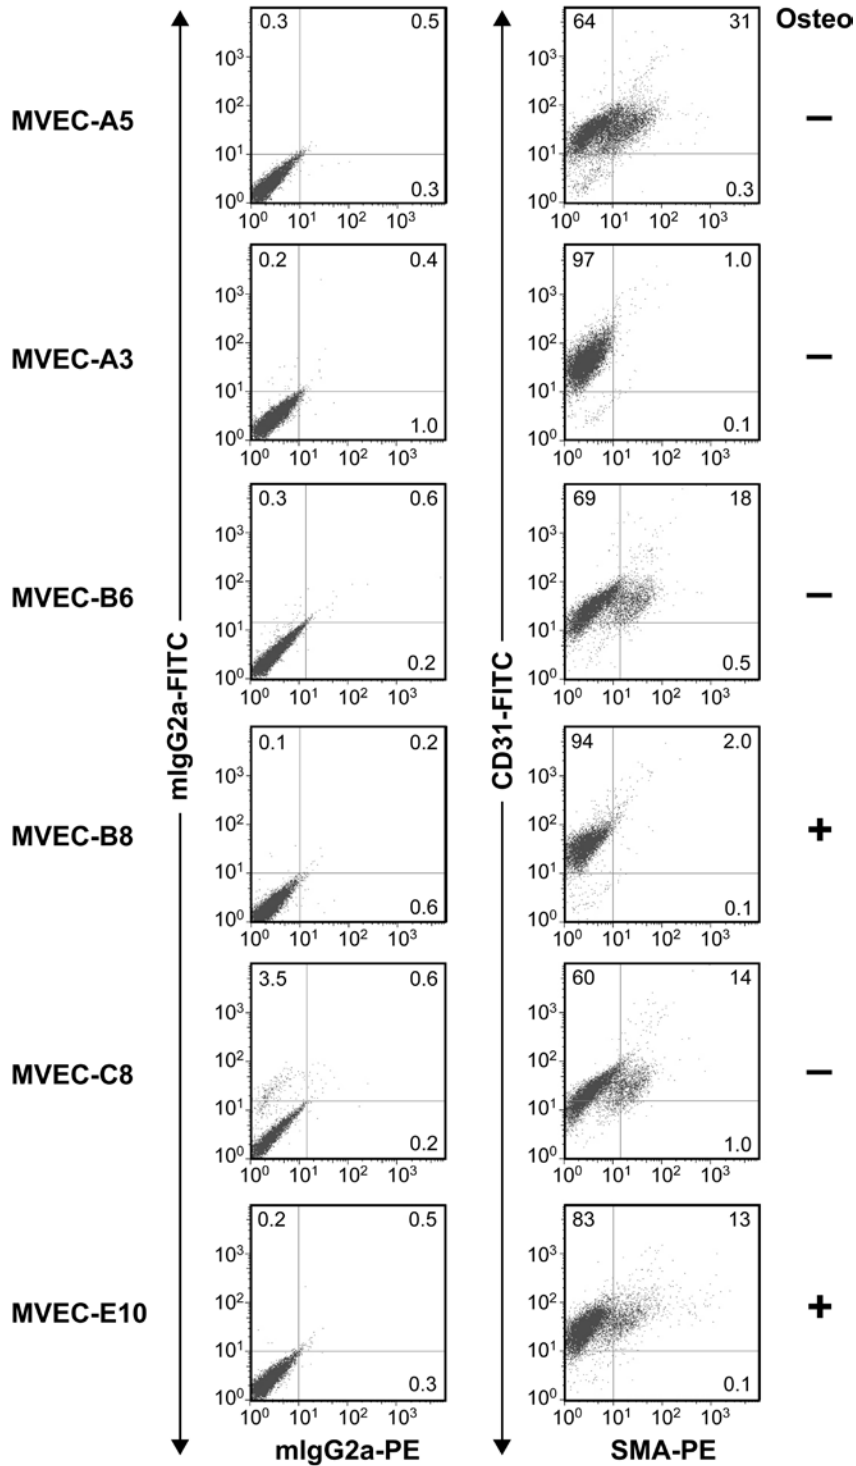

Supplemental Figure |

Flow cytometric analyses of mitral valve EC clones shown in Figure 5A. Clones shown to undergo osteogenesis in Figure 5A are denoted by +.

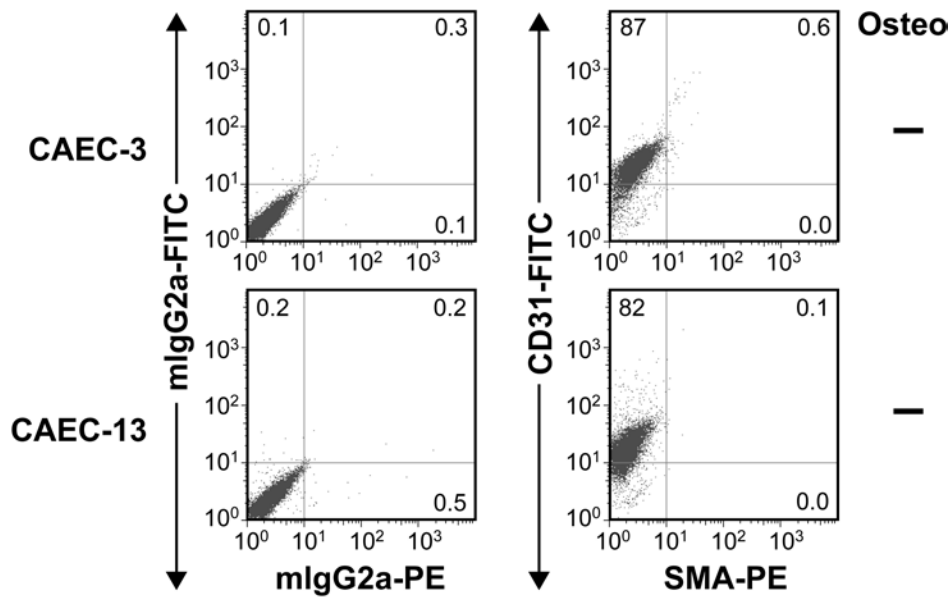

Supplemental Figure II

Flow cytometric analyses of ovine carotid artery EC clones shown in Figure 5B. Osteogenesis was not detected.
